# Supplementary material for: High-capacity vanadium nitride anode materials synthesized by melamine-assisted pyrolysis
Source: Royal Society of Chemistry journal article supplement (doi:10.1039/d4nj01163e), 2024-01-01
Supplement: d4nj01163e1.pdf [file d4nj01163e1.pdf]

**High-capacity Vanadium Nitride Anode Materials by Melamine-assisted Pyrolysis**

Hao Dang<sup>#</sup>, Lu Wang<sup>#</sup>, Yuanyou Peng, Lei Zhao, Yuan Li, Xiaoya Kang, Fen Ran\*

*State Key Laboratory of Advanced Processing and Recycling of Non-ferrous Metals,  
School of Materials Science and Engineering, Lanzhou University of Technology,  
Lanzhou 730050, Gansu, China*

*\*Corresponding author: ranfen@lut.edu.cn, or ranfen@163.com*

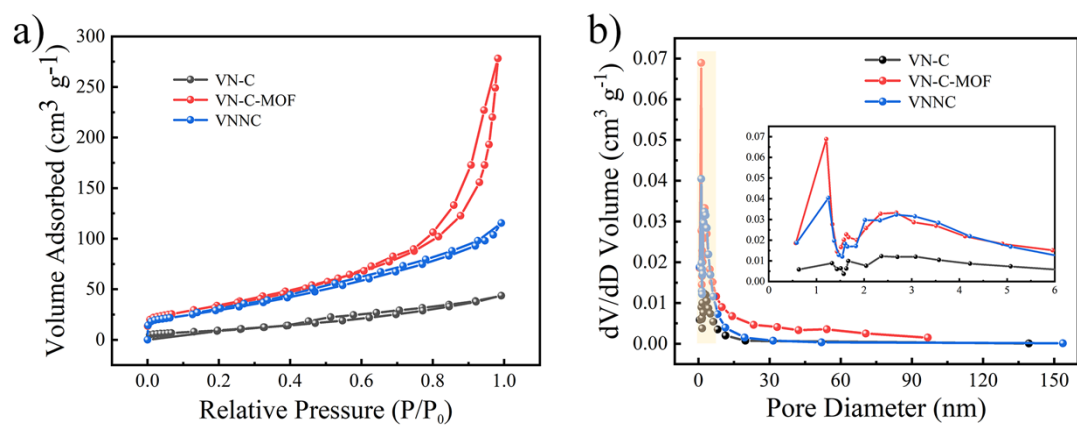

**Figure S1.** a) Isothermal nitrogen adsorption-desorption curves, b) Pore size distribution curves.

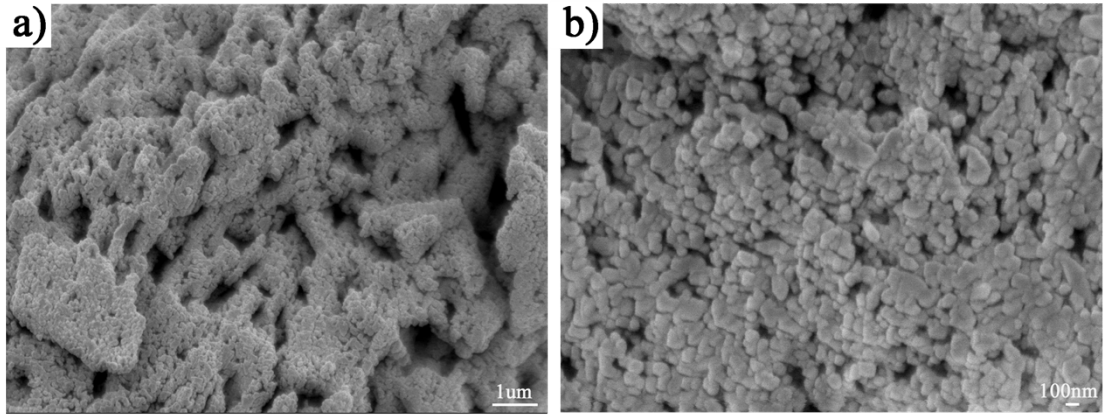

*Figure S2. SEM image of VN at different magnifications.*

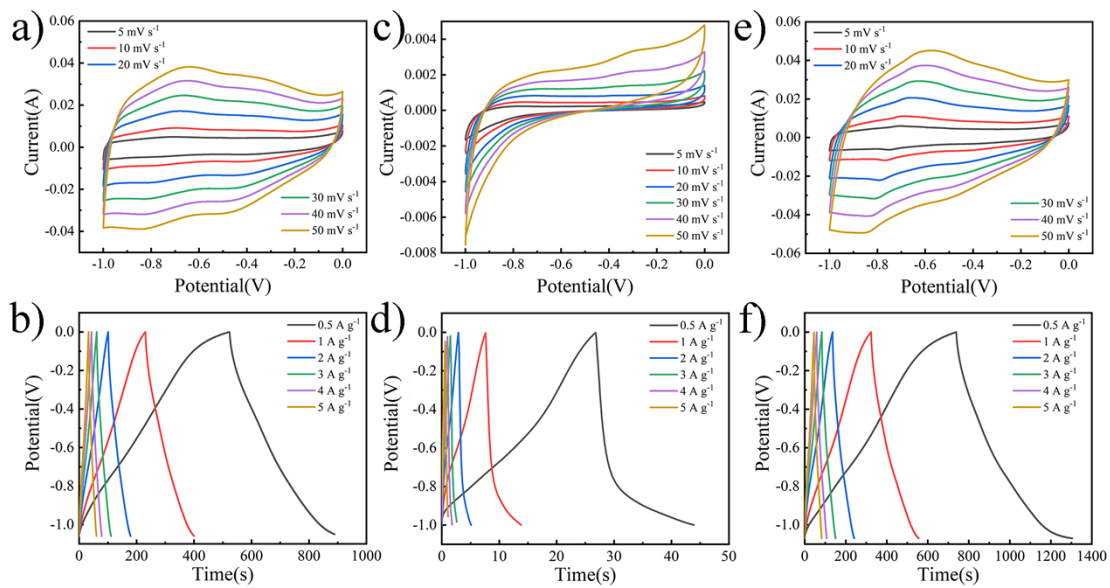

**Figure S3.** a), c), and e) CV curves of VN-C, VN-C-MOF, and VNNC at different scan rates. b), d), and f) GCD curves of VN-C, VN-C-MOF, and VNNC at different current densities.

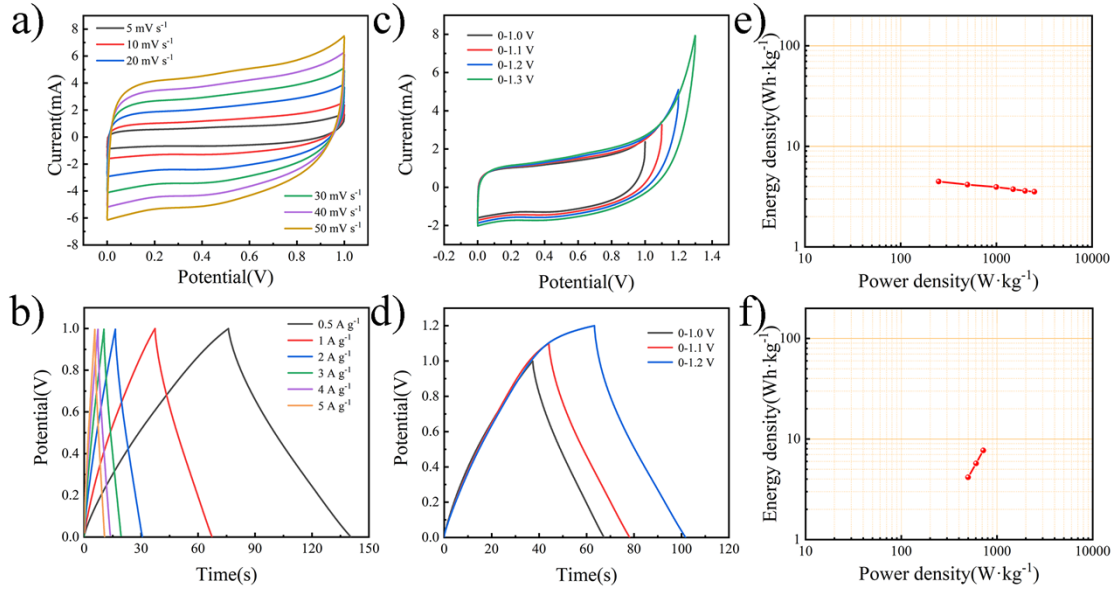

**Figure S4.** a) CV curves at various scan rates from 5 to 50  $\text{mV s}^{-1}$ , b) GCD curves at different current densities ranging from 0.5 to 5  $\text{A g}^{-1}$ . c-d) CV and GCD curves after widening the potential window. e), f) Ragone plots of the device.

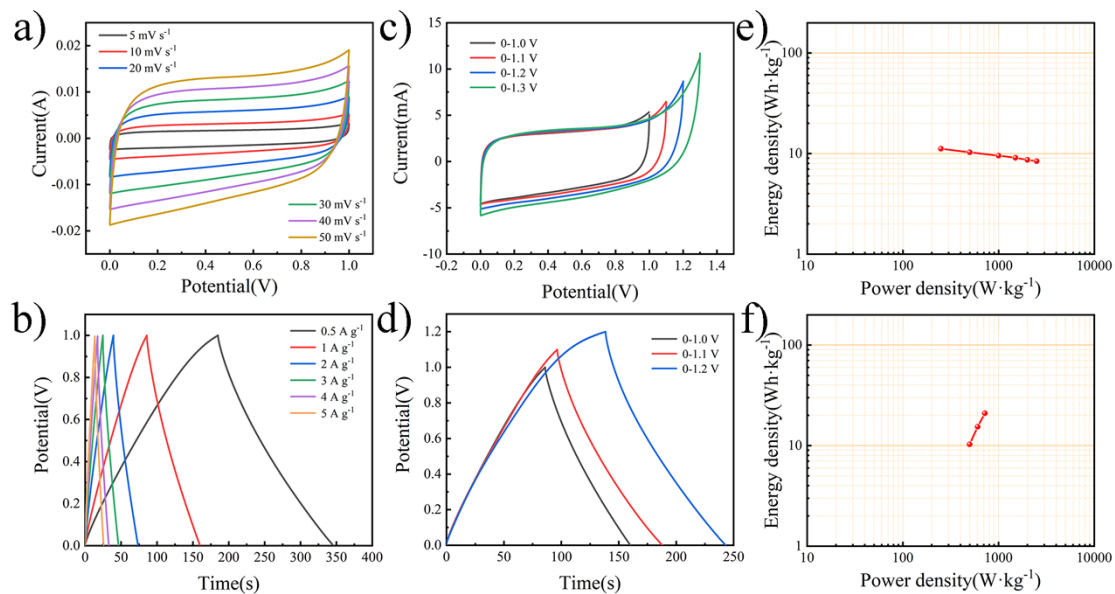

**Figure S5.** a) CV curves at various scan rates from 5 to 50  $\text{mV s}^{-1}$ , b) GCD curves at different current densities ranging from 0.5 to 5  $\text{A g}^{-1}$ . c-d) CV and GCD curves after widening the potential window. e), f) Ragone plots of the device.

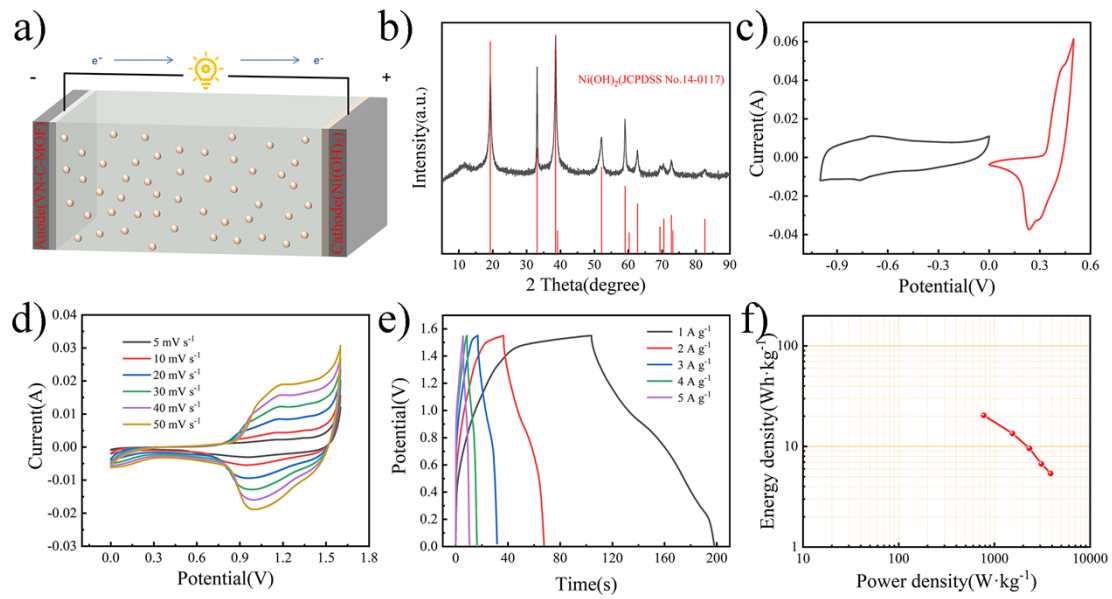

**Figure S6.** a) Schematic diagram of an asymmetric device. b) XRD patterns of Ni(OH)<sub>2</sub>. c) CV curve comparison diagram of VNNC and Ni(OH)<sub>2</sub> at 10 mV s<sup>-1</sup>. d) CV curves at different scan rates from 5 to 50 mV s<sup>-1</sup>, e) GCD curves at different current densities ranging from 1 to 5 A g<sup>-1</sup>, and f) Ragone plots of the device.

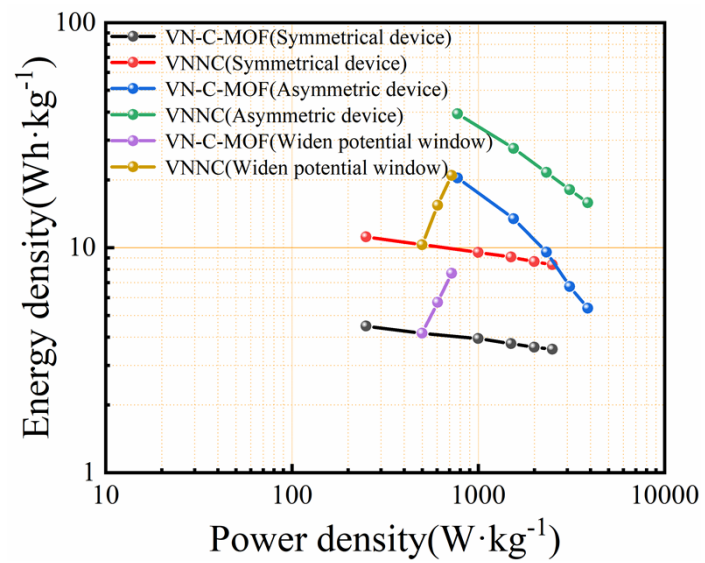

**Figure S7.** Comparison of energy and power density of VN-C-MOF and VNNC in different devices and current densities.



**Table S1.** Specific surface area and pore parameters of VN-C, VN-C-MOF, and VNNC.

| Samples  | S <sub>BET</sub> (m <sup>2</sup> g <sup>-1</sup> ) | V <sub>p</sub> (cm <sup>3</sup> g <sup>-1</sup> ) | V <sub>Mic</sub> (cm <sup>3</sup> g <sup>-1</sup> ) | Micropores (%) | Mesopores and macropores (%) |
|----------|----------------------------------------------------|---------------------------------------------------|-----------------------------------------------------|----------------|------------------------------|
| VN-C     | 32.934                                             | 0.083                                             | 0.0104                                              | 11.13          | 88.87                        |
| VN-C-MOF | 121.674                                            | 0.459                                             | 0.0456                                              | 9.04           | 90.96                        |
| VNNC     | 106.669                                            | 0.198                                             | 0.0389                                              | 16.40          | 83.60                        |

**Table S2.** Specific capacity of VN, VN-C, V-MOF, VN-C-MOF and VNNC at different current densities.

| Materials | Current density         |                         |                         |                         |                         |                         |
|-----------|-------------------------|-------------------------|-------------------------|-------------------------|-------------------------|-------------------------|
|           | 0.5 A g <sup>-1</sup>   | 1 A g <sup>-1</sup>     | 2 A g <sup>-1</sup>     | 3 A g <sup>-1</sup>     | 4 A g <sup>-1</sup>     | 5 A g <sup>-1</sup>     |
| VN        | 72.1 F g <sup>-1</sup>  | 67.5 F g <sup>-1</sup>  | 63.6 F g <sup>-1</sup>  | 61.5 F g <sup>-1</sup>  | 60.0 F g <sup>-1</sup>  | 58.0 F g <sup>-1</sup>  |
| VN-C      | 174.1 F g <sup>-1</sup> | 159.7 F g <sup>-1</sup> | 146.8 F g <sup>-1</sup> | 139.3 F g <sup>-1</sup> | 133.6 F g <sup>-1</sup> | 128.8 F g <sup>-1</sup> |
| V-MOF     | 8.6 F g <sup>-1</sup>   | 6.2 F g <sup>-1</sup>   | 4.4 F g <sup>-1</sup>   | 3.3 F g <sup>-1</sup>   | 3.2 F g <sup>-1</sup>   | 2.5 F g <sup>-1</sup>   |
| VN-C-MOF  | 263 F g <sup>-1</sup>   | 216.8 F g <sup>-1</sup> | 196.3 F g <sup>-1</sup> | 187.7 F g <sup>-1</sup> | 180.2 F g <sup>-1</sup> | 175.7 F g <sup>-1</sup> |
| VNNC      | 407.5 F g <sup>-1</sup> | 333.0 F g <sup>-1</sup> | 289.9 F g <sup>-1</sup> | 272.8 F g <sup>-1</sup> | 258.7 F g <sup>-1</sup> | 249.1 F g <sup>-1</sup> |

**Table S3.** Energy and power density of VN-C-MOF symmetric devices at different current densities.

| Current density          | 0.5 A g <sup>-1</sup>    | 1 A g <sup>-1</sup>      | 2 A g <sup>-1</sup>      | 3 A g <sup>-1</sup>      | 4 A g <sup>-1</sup>      | 5 A g <sup>-1</sup>      |
|--------------------------|--------------------------|--------------------------|--------------------------|--------------------------|--------------------------|--------------------------|
| C (F g <sup>-1</sup> )   | 32.25 F g <sup>-1</sup>  | 30.0 F g <sup>-1</sup>   | 28.4 F g <sup>-1</sup>   | 27.0 F g <sup>-1</sup>   | 26.0 F g <sup>-1</sup>   | 25.5 F g <sup>-1</sup>   |
| E (Wh Kg <sup>-1</sup> ) | 4.48 Wh Kg <sup>-1</sup> | 4.17 Wh Kg <sup>-1</sup> | 3.94 Wh Kg <sup>-1</sup> | 3.75 Wh Kg <sup>-1</sup> | 3.61 Wh Kg <sup>-1</sup> | 3.54 Wh Kg <sup>-1</sup> |
| P (W Kg <sup>-1</sup> )  | 250 W Kg <sup>-1</sup>   | 500 W Kg <sup>-1</sup>   | 1000 W Kg <sup>-1</sup>  | 1500 W Kg <sup>-1</sup>  | 2000 W Kg <sup>-1</sup>  | 2500 W Kg <sup>-1</sup>  |

**Table S4.** Energy and power density of VN-C-MOF symmetric devices in a widened potential window.

| Potential window | C (F g <sup>-1</sup> ) | E (Wh Kg <sup>-1</sup> ) | P (W Kg <sup>-1</sup> )   |
|------------------|------------------------|--------------------------|---------------------------|
| 1.0 V            | 30.0 F g <sup>-1</sup> | 4.17 Wh Kg <sup>-1</sup> | 500.00 W Kg <sup>-1</sup> |
| 1.1 V            | 34.0 F g <sup>-1</sup> | 5.71 Wh Kg <sup>-1</sup> | 605.00 W Kg <sup>-1</sup> |
| 1.2 V            | 38.5 F g <sup>-1</sup> | 7.7 Wh Kg <sup>-1</sup>  | 720.00 W Kg <sup>-1</sup> |

**Table S5.** Energy and power density of VNNC symmetric devices at different current densities.

| Current density          | 0.5 A g <sup>-1</sup>    | 1 A g <sup>-1</sup>      | 2 A g <sup>-1</sup>     | 3 A g <sup>-1</sup>     | 4 A g <sup>-1</sup>     | 5 A g <sup>-1</sup>     |
|--------------------------|--------------------------|--------------------------|-------------------------|-------------------------|-------------------------|-------------------------|
| C (F g <sup>-1</sup> )   | 80.4 F g <sup>-1</sup>   | 72.2 F g <sup>-1</sup>   | 68.6 F g <sup>-1</sup>  | 65.4 F g <sup>-1</sup>  | 62.4 F g <sup>-1</sup>  | 60.5 F g <sup>-1</sup>  |
| E (Wh Kg <sup>-1</sup> ) | 11.2 Wh Kg <sup>-1</sup> | 10.3 Wh Kg <sup>-1</sup> | 9.5 Wh Kg <sup>-1</sup> | 9.1 Wh Kg <sup>-1</sup> | 8.7 Wh Kg <sup>-1</sup> | 8.4 Wh Kg <sup>-1</sup> |
| P (W Kg <sup>-1</sup> )  | 250 W Kg <sup>-1</sup>   | 500 W Kg <sup>-1</sup>   | 1000 W Kg <sup>-1</sup> | 1500 W Kg <sup>-1</sup> | 2000 W Kg <sup>-1</sup> | 2500 W Kg <sup>-1</sup> |

**Table S6.** Energy and power density of VNNC symmetric devices in a widened potential window.

| Potential window | C (F g <sup>-1</sup> )  | E (Wh Kg <sup>-1</sup> )  | P (W Kg <sup>-1</sup> )   |
|------------------|-------------------------|---------------------------|---------------------------|
| 1.0 V            | 72.2 F g <sup>-1</sup>  | 10.31 Wh Kg <sup>-1</sup> | 500.00 W Kg <sup>-1</sup> |
| 1.1 V            | 91.7 F g <sup>-1</sup>  | 15.41 Wh Kg <sup>-1</sup> | 605.00 W Kg <sup>-1</sup> |
| 1.2 V            | 104.7 F g <sup>-1</sup> | 20.94 Wh Kg <sup>-1</sup> | 720.00 W Kg <sup>-1</sup> |

**Table S7.** Energy and power density of VN-C-MOF asymmetric devices at different current densities.

| Current density          | 1 A g <sup>-1</sup>       | 2 A g <sup>-1</sup>       | 3 A g <sup>-1</sup>      | 4 A g <sup>-1</sup>      | 5 A g <sup>-1</sup>      |
|--------------------------|---------------------------|---------------------------|--------------------------|--------------------------|--------------------------|
| C (F g <sup>-1</sup> )   | 61.10 F g <sup>-1</sup>   | 40.26 F g <sup>-1</sup>   | 28.65 F g <sup>-1</sup>  | 20.13 F g <sup>-1</sup>  | 16.13 F g <sup>-1</sup>  |
| E (Wh Kg <sup>-1</sup> ) | 20.39 Wh Kg <sup>-1</sup> | 13.43 Wh Kg <sup>-1</sup> | 9.56 Wh Kg <sup>-1</sup> | 6.72 Wh Kg <sup>-1</sup> | 5.38 Wh Kg <sup>-1</sup> |
| P (W Kg <sup>-1</sup> )  | 775 W Kg <sup>-1</sup>    | 1550 W Kg <sup>-1</sup>   | 2325 W Kg <sup>-1</sup>  | 3100 W Kg <sup>-1</sup>  | 3875 W Kg <sup>-1</sup>  |

**Table S8.** Energy and power density of VNNC asymmetric devices at different current densities.

| Current density          | 1 A g <sup>-1</sup>       | 2 A g <sup>-1</sup>      | 3 A g <sup>-1</sup>       | 4 A g <sup>-1</sup>       | 5 A g <sup>-1</sup>       |
|--------------------------|---------------------------|--------------------------|---------------------------|---------------------------|---------------------------|
| C (F g <sup>-1</sup> )   | 117.74 F g <sup>-1</sup>  | 82.71 F g <sup>-1</sup>  | 64.65 F g <sup>-1</sup>   | 54.19 F g <sup>-1</sup>   | 47.42 F g <sup>-1</sup>   |
| E (Wh Kg <sup>-1</sup> ) | 39.29 Wh Kg <sup>-1</sup> | 27.6 Wh Kg <sup>-1</sup> | 21.57 Wh Kg <sup>-1</sup> | 18.08 Wh Kg <sup>-1</sup> | 15.82 Wh Kg <sup>-1</sup> |
| P (W Kg <sup>-1</sup> )  | 775 W Kg <sup>-1</sup>    | 1550 W Kg <sup>-1</sup>  | 2325 W Kg <sup>-1</sup>   | 3100 W Kg <sup>-1</sup>   | 3875 W Kg <sup>-1</sup>   |
